# Supplementary material
Source: PubMed Central journal article supplement (PMC1440323)
Supplement: 7601039s2.pdf [file 7601039s2.pdf]

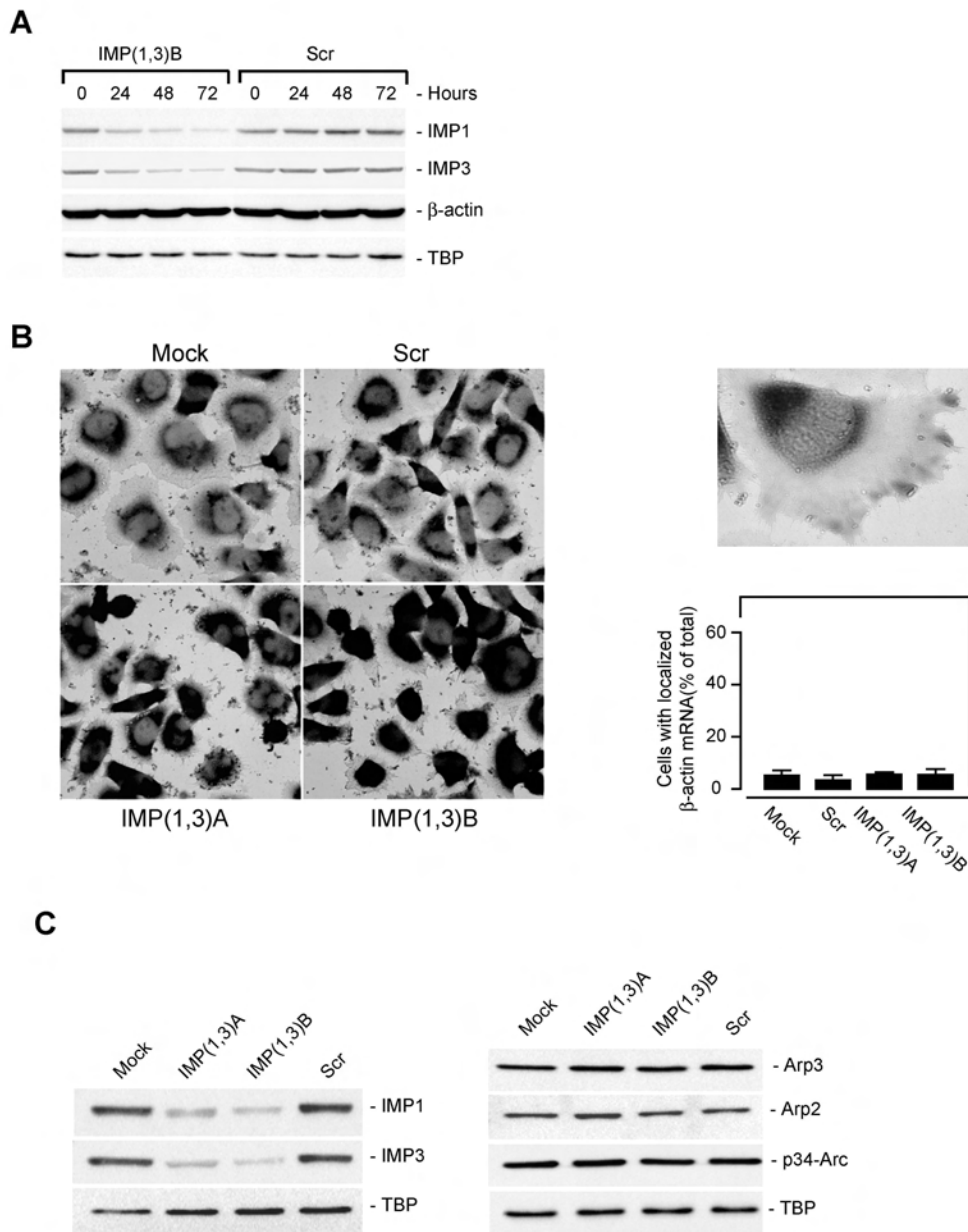

**Figure S1**  $\beta$ -actin and Arp2/3 protein and mRNA in IMP depleted cells. (A)  $\beta$ -actin protein levels were examined in cells treated with IMP(1,3)B siRNA or Scr siRNA by western blot analysis. The cells were harvested 0, 24, 48 or 72 hours after Scr transfection and blots were incubated with anti-IMP1, anti-IMP3, anti- $\beta$ -actin or anti-TBP antibodies. (B)  $\beta$ -actin mRNA localization was examined by in situ hybridization on cells treated with Scr, IMP(1,3)A or IMP(1,3)B siRNA, as well as, mock treated cells. The bar chart (lower right panel) shows the percentage of cells with localized or polarized  $\beta$ -actin mRNA. The upper right picture illustrates a cell with localized  $\beta$ -actin mRNA in the cytoplasmic projections. (C) The levels of the Arp2, Arp3 and p34-Arc proteins were examined by western blot analysis of cells treated with Scr, IMP(1,3)A or IMP(1,3)B siRNAs, respectively. Proteins were detected with anti-IMP1, anti-IMP3, anti-Arp3, anti-Arp2, anti-p34-Arc and anti-TBP antibodies, respectively. The knock-down of IMP is shown in the left panel and the levels of the Arp3, Arp2 and p34-Arc are shown in the right panel.
