# Supplementary material
Source: PubMed Central journal article supplement (PMC1440323)
Supplement: 7601039s3.pdf [file 7601039s3.pdf]

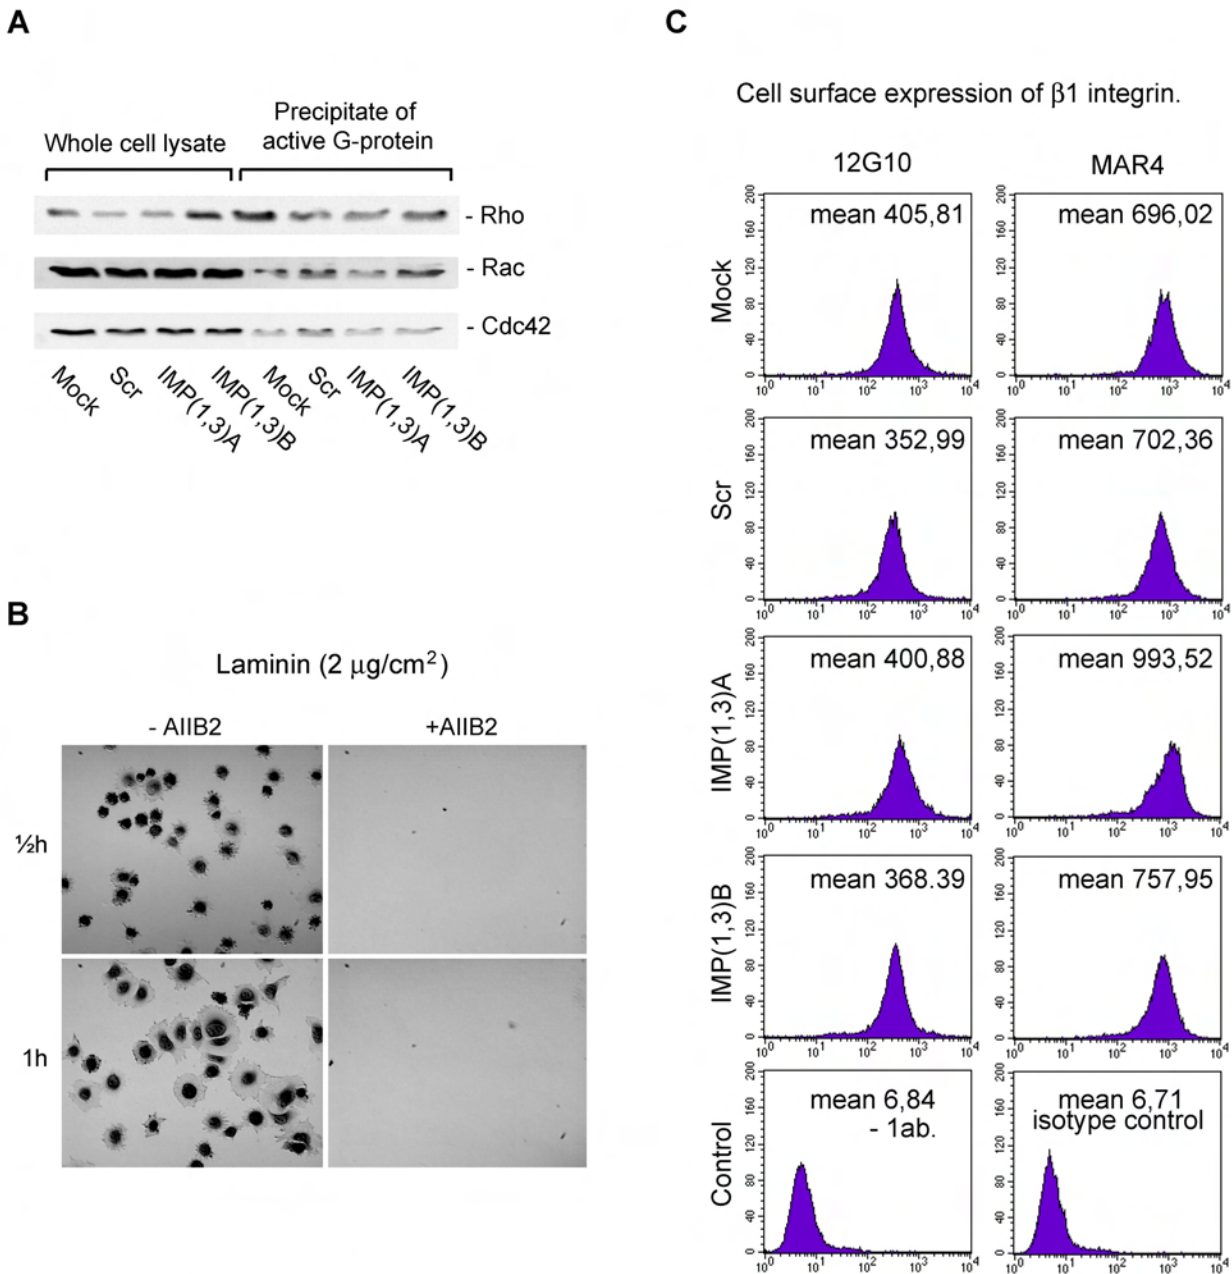

**Figure S2** Rho, Rac and Cdc42 activation and integrin levels in IMP depleted cells. (A) HeLa cells were mock treated or transfected with Scr, IMP(1,3)A or IMP(1,3)B siRNA. Seventy-two hours after transfection the GTP-bound form of Rho, Rac and Cdc42 were affinity-precipitated with Rhotekin Rho binding domain (Rho) and the p21-binding domain of human PAK-1 (Rac and Cdc42), respectively. Western blot analysis was performed on whole cells lysate and affinity-precipitated extracts using anti-Rho, anti-Rac and anti-Cdc42 antibodies. (B) HeLa cells were incubated with or without the function-blocking monoclonal antibody to  $\beta 1$  integrin (AIB2) prior to seeding on a laminin-1 coated surface. The cells were fixed after 0.5 and 1 hour and stained with crystal violet. (C) Cell surface expression of activated and total  $\beta 1$  integrin was examined in IMP depleted cells. Seventy-two hours after transfection with Scr, IMP(1,3)A or IMP(1,3)B siRNA, cells were detached and incubated with the  $\beta 1$  integrin 12G10 (recognizing the activated form of  $\beta 1$  integrin) and MAR4 (recognizing total  $\beta 1$  integrin) antibodies. A mouse isotype control was included as a negative control. The primary antibodies were visualized by FITC-conjugated anti-mouse antibody and examined by flow cytometry.
