# Supplementary material
Source: PubMed Central journal article supplement (PMC1440323)
Supplement: 7601039s4.pdf [file 7601039s4.pdf]

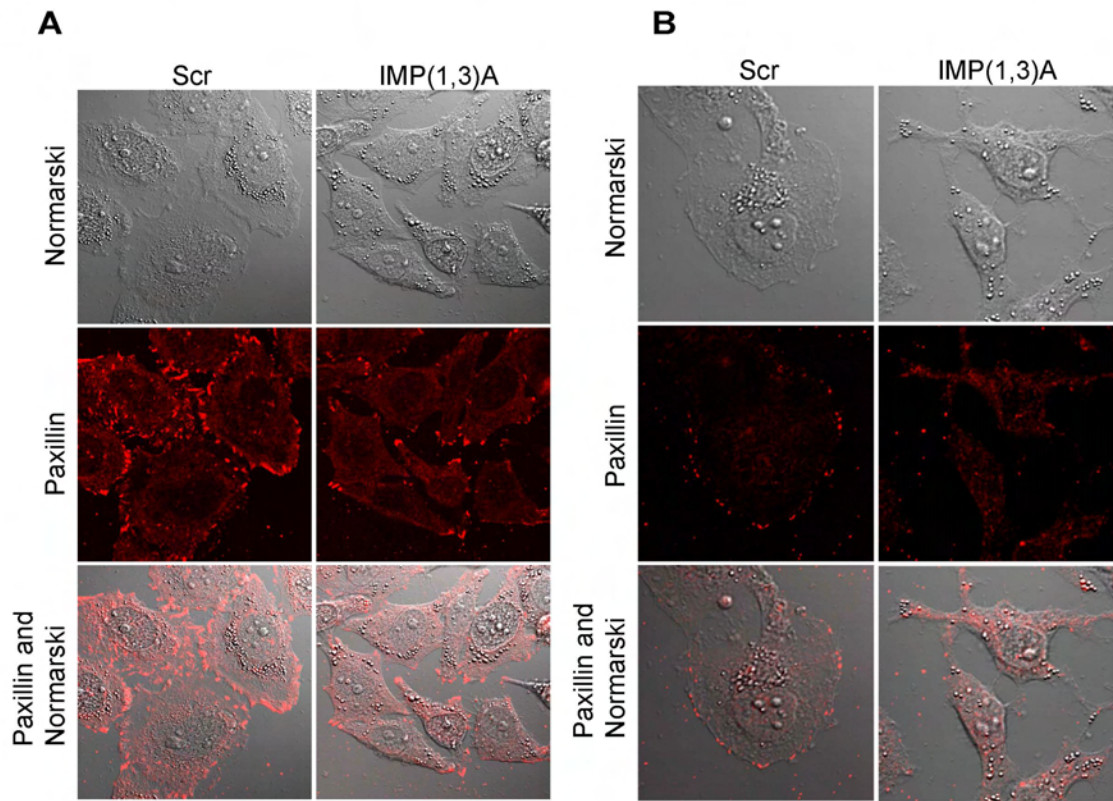

**Figure S3** Focal complex (FX) supported protrusive edges in IMP depleted cells. **(A)** HeLa cells were transfected with Scr or IMP(1,3)A siRNAs and stained with an anti-paxillin antibody to depict FXs. **(B)** HeLa cells were transfected with Scr or IMP(1,3)A siRNAs and incubated with 20  $\mu$ M ROCK inhibitor Y-27632 for 20 hours before the cells were fixated and stained with the anti-paxillin antibody.
